# Supplementary material for: RIPK3 Orchestrates Fatty Acid Metabolism in Tumor-Associated Macrophages and Hepatocarcinogenesis
Source: Oxford University Press journal article supplement (doi:10.1158/2326-6066.cir-19-0261), 2020-03-02
Supplement: 23266066cir190261-sup-220460_2_supp_6084189_q69xql.doc [file 23266066cir190261-sup-220460_2_supp_6084189_q69xql.doc]

**Supplementary Materials**

**Supplementary Table**

**Table S1: Human clinical HCC sample characteristics.**

| Patients number | Disease | Gender | Age | ALT (U/L) | AST (U/L) | AFP (ng/mL) | CEA (ng/mL) | AJCC stage |
| --- | --- | --- | --- | --- | --- | --- | --- | --- |
| 1 | HBV | Male | 62 | 147.4 | 99.6 | 14.21 | 2.28 | IIA |
| 2 | HBV | Female | 53 | 61.1 | 48.7 | 26.01 | 1.97 | IIB |
| 3 | NASH | Male | 53 | 44.4 | 55.3 | >2000 | 2.22 | IIA |
| 4 | HBV | Male | 51 | 63.3 | 51.9 | 146.43 | 3.35 | IB |
| 5 | HBV | Male | 47 | 37.5 | 26.4 | 3.35 | 3.76 | IIA |

**Supplementary Figures**
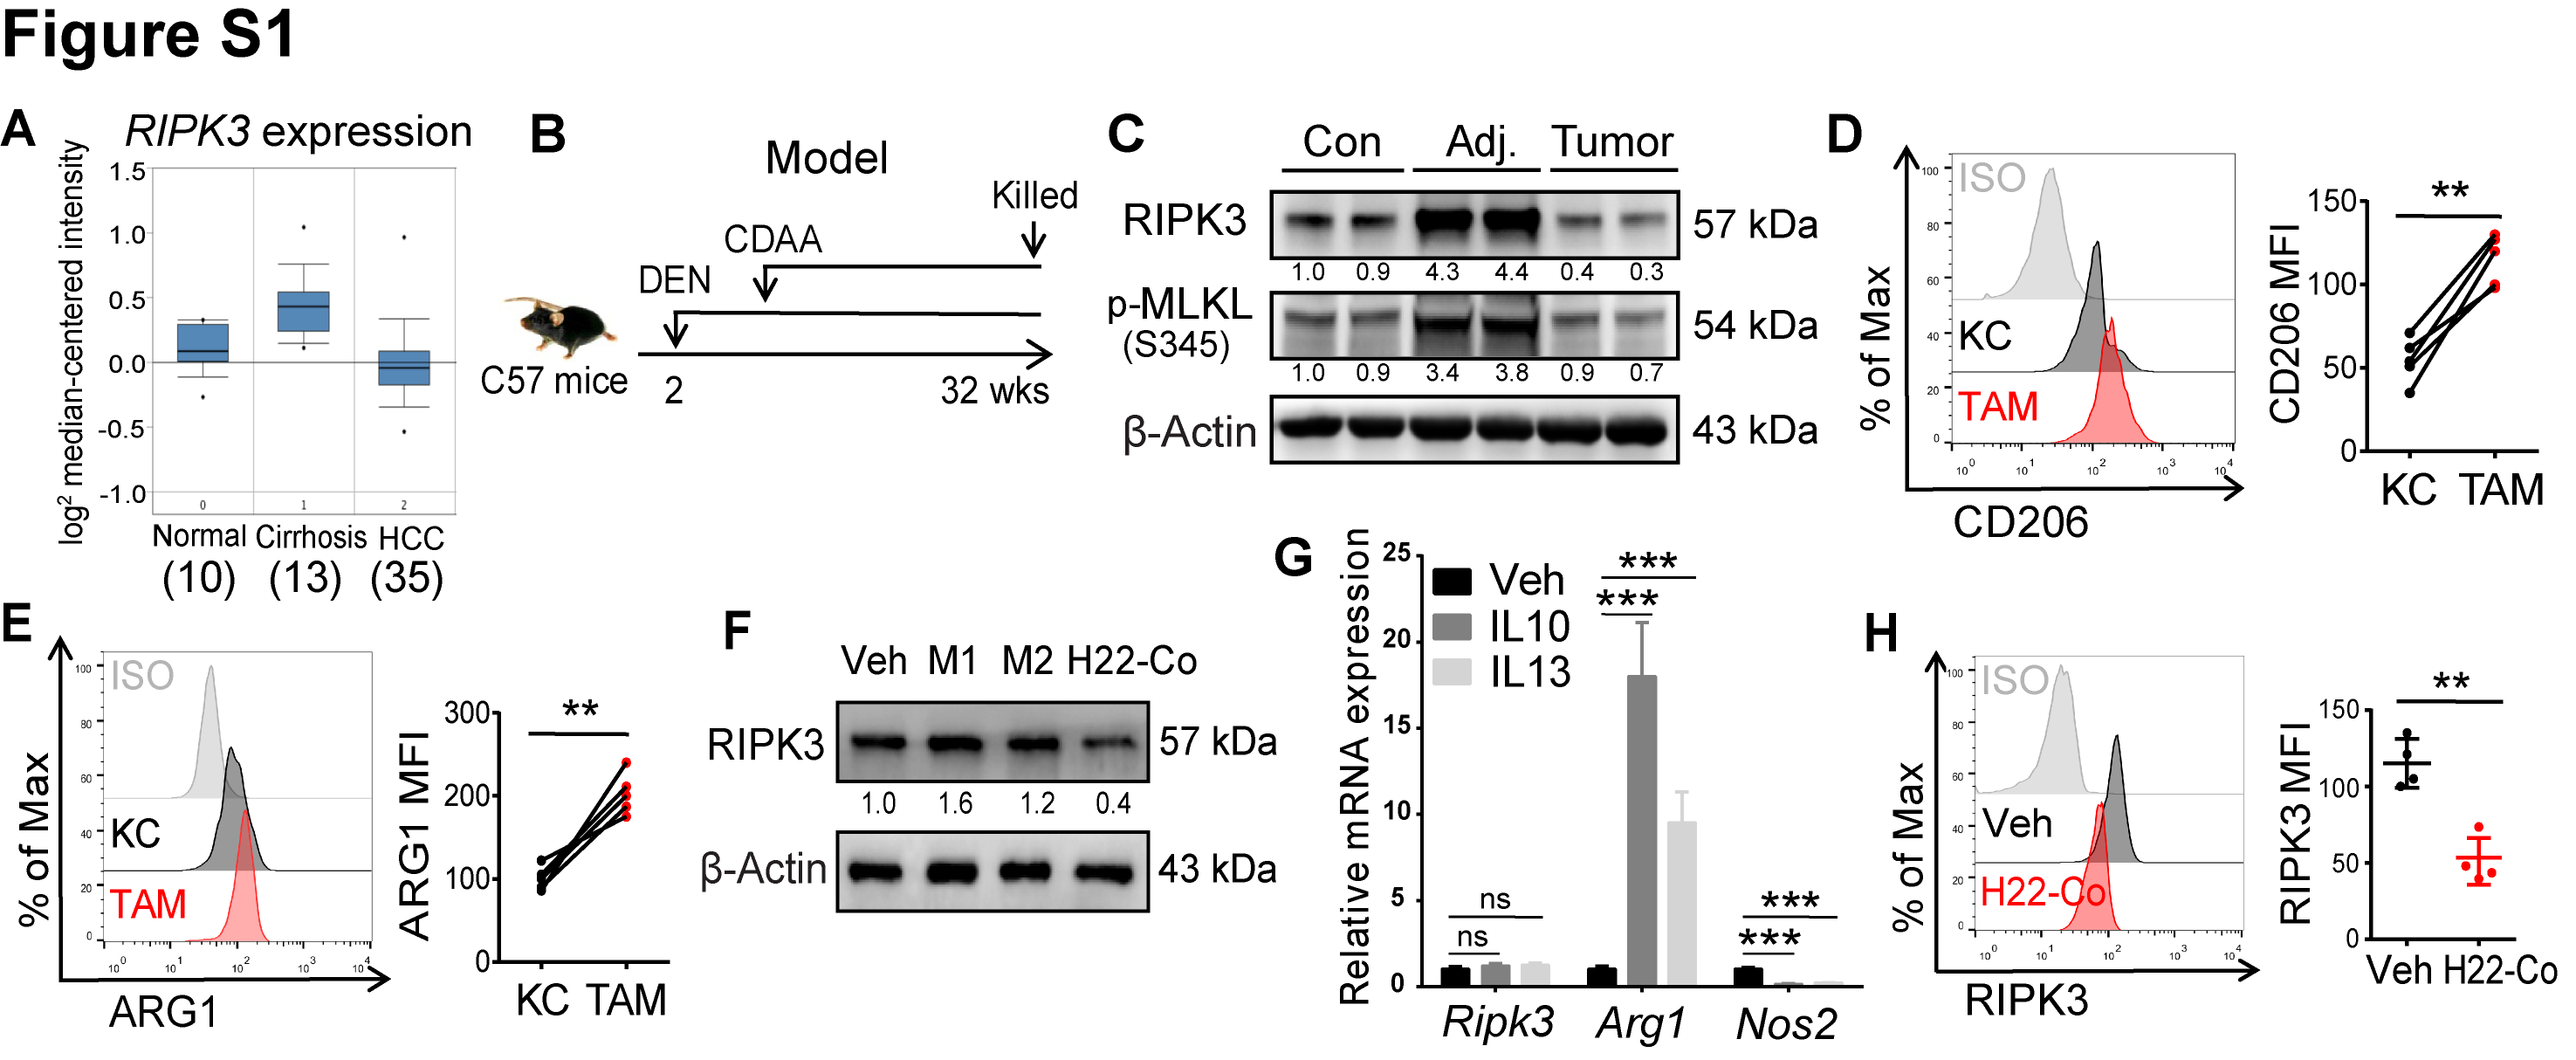


**Figure S1. RIPK3 expression in HCC tissues and TAMs. A,** Expression levels of *RIPK3* in normal liver, cirrhosis and HCC tissues analyzed by Oncomine database. **B,** Schematic of the DEN+CDAA diet induced HCC model. **C,** RIPK3 and p-MLKL (Ser345) protein levels in normal liver (Con), adjacent tissues and tumor tissues from WT mice after CDAA diet. **D, E,** CD206 **(D)** and Arg1 **(E)** expression on KCs and TAMs from mice fed with CDAA diet; *n =* 5. **F,** Protein levels of RIPK3 in BMDMs after LPS + IFN-γ or IL-4 stimulation for 24 hrs or co-cultured with H22 (1:1) for 48 hrs. The normalized expression levels were labeled below respective blots. **G,** mRNA expressions of *Ripk3,* *Arg1* and *Nos2* in BMDMs after IL-10 (20ng/ml) or IL-13 (20ng/ml) treatment for 24 hrs; *n =* 3. **H,** RIPK3 expression in BMDMs after co-culture with H22 for 48 hrs. Data are shown as means ± SEM, **P <* 0.05, ***P <* 0.01, student’s t test.


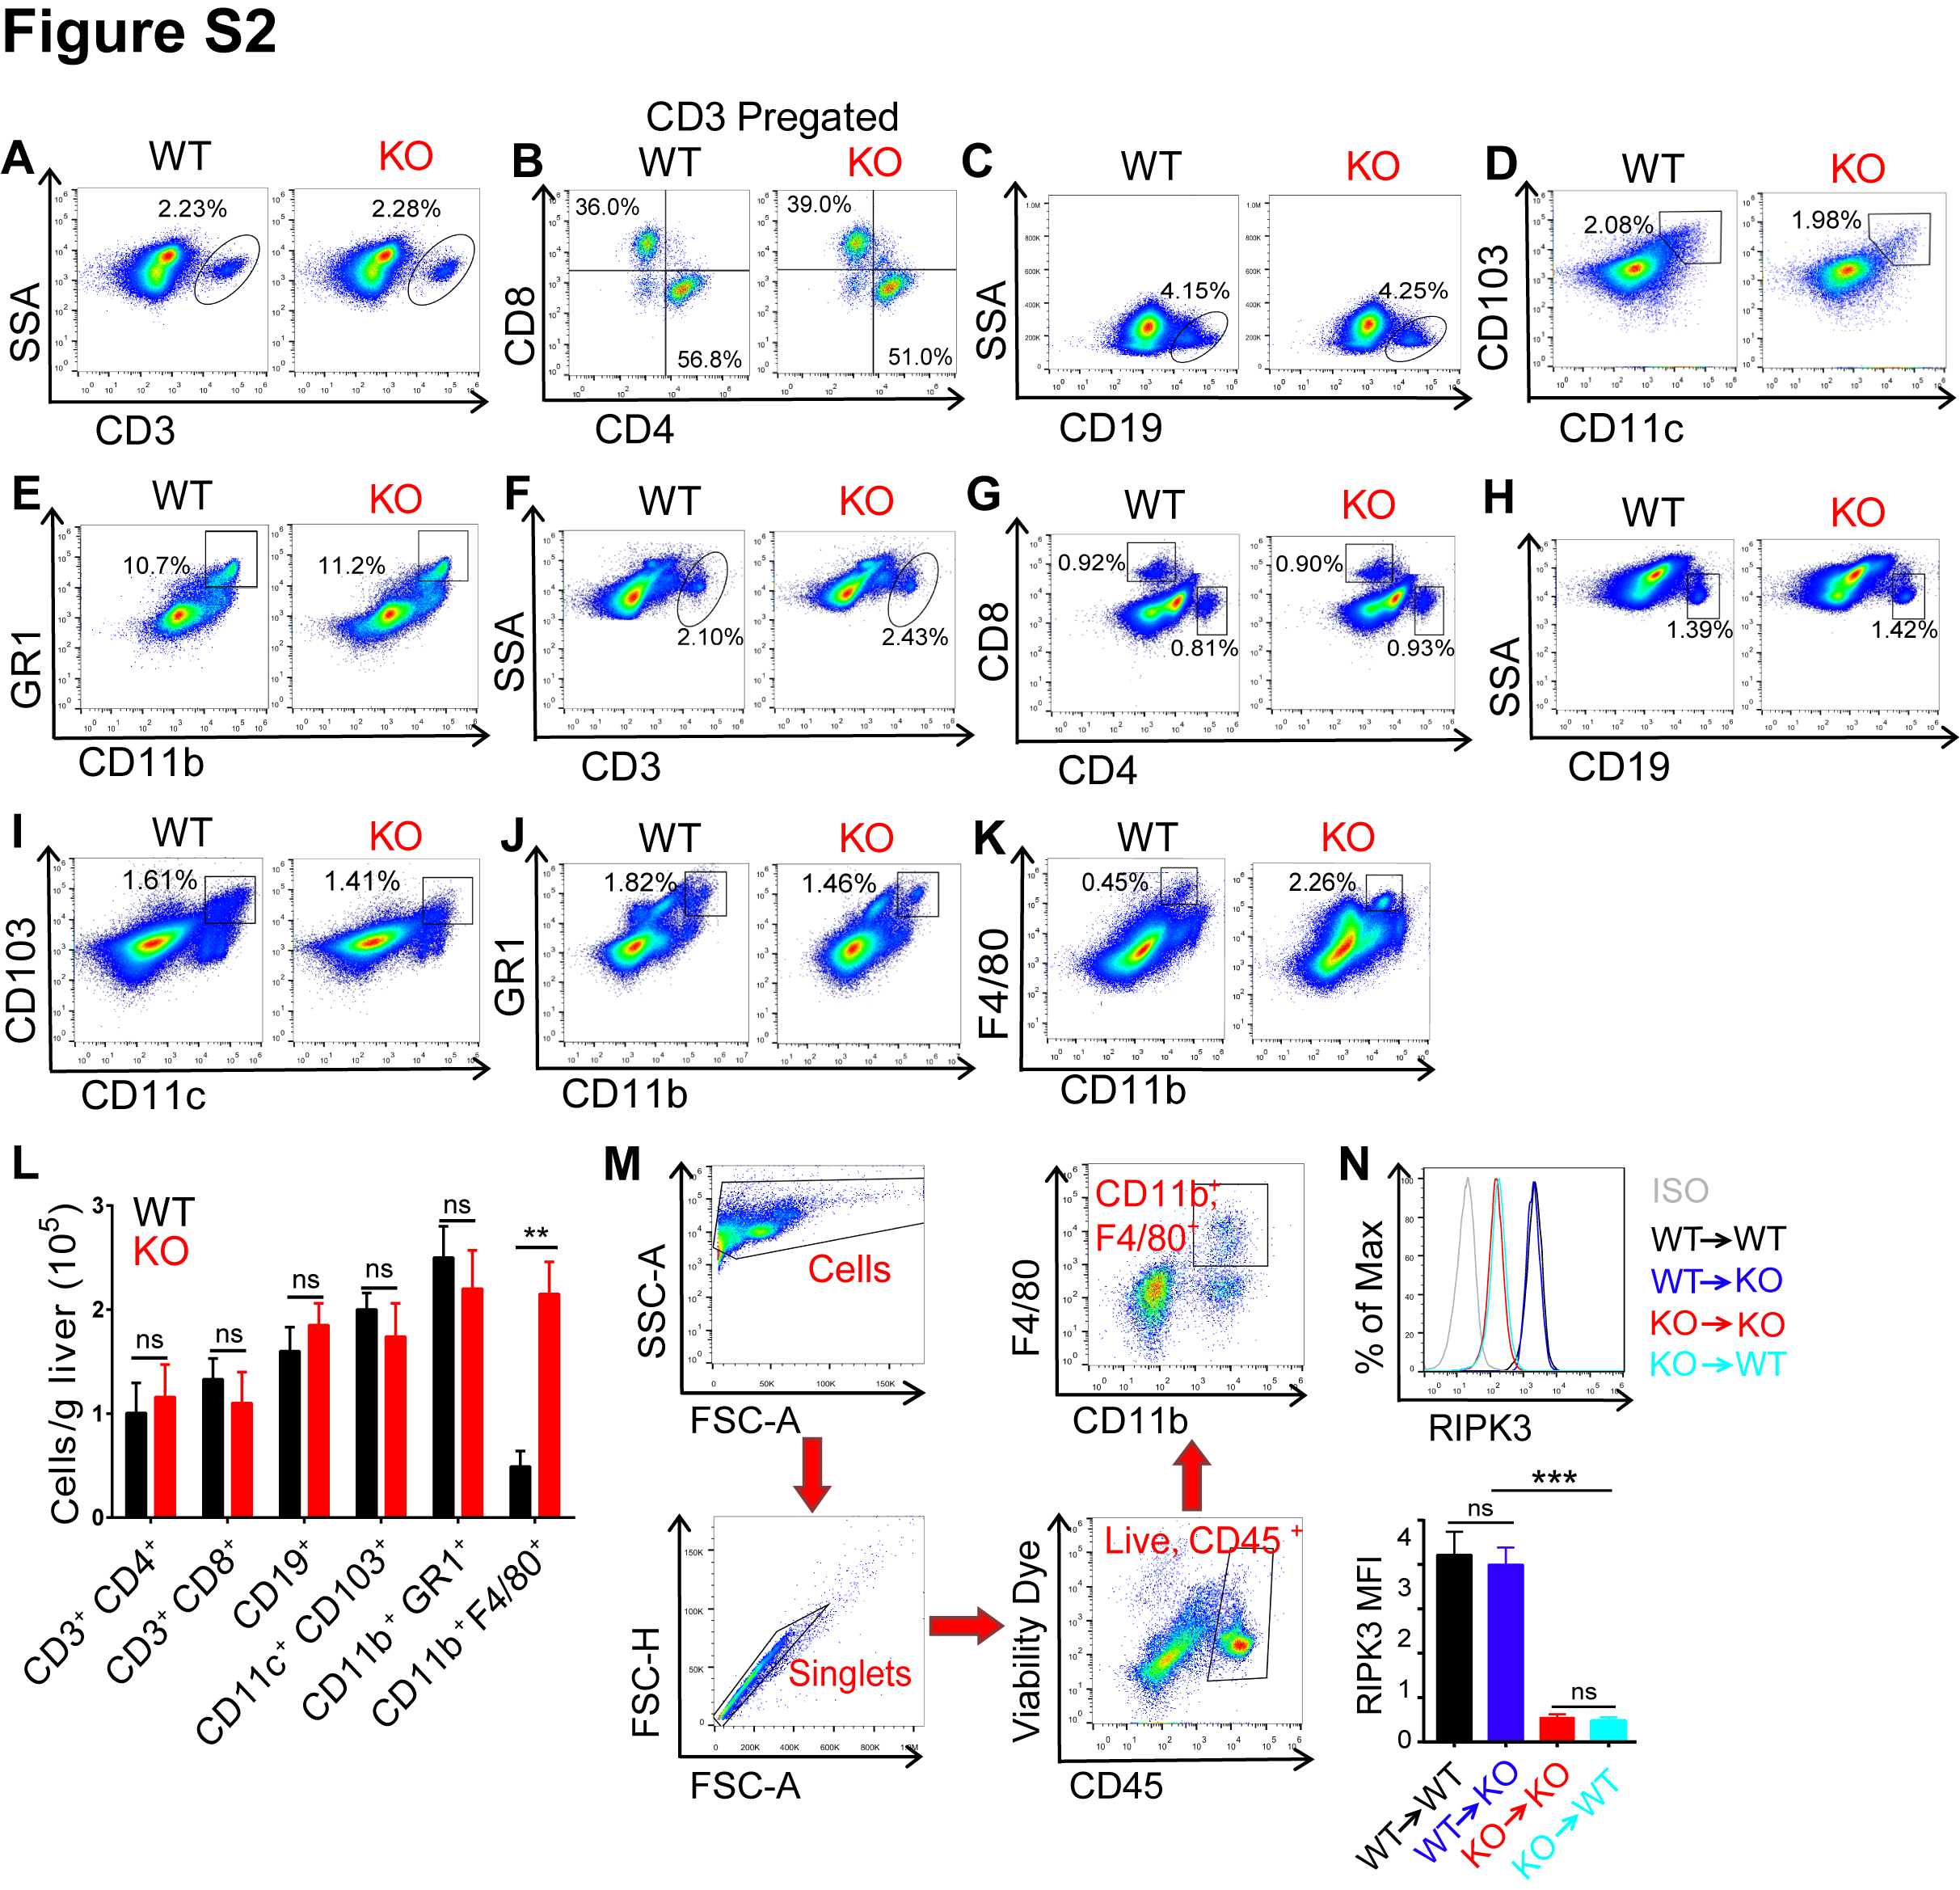


**Figure S2. Immune cell composition in WT and RIPK3-KO mice after CDAA diet and chimeric experiments. A-E,** The frequency of T cells (**A, B**), B cells **(C)**, DC **(D)** and MDSC **(E)** in HCC tissues from WT and KO mice were determined by FCM. **F**-**L,** The frequency of T cells (**F,** **G**), B cells **(H)** DC **(I)**, MDSC **(J)** and macrophages **(K)** in adjacent tissues from WT and KO mice after CDAA diet were determined by FCM. **(L)** Statistical results of (**F-K**). **M**, **N**, FACS gating strategy of macrophages from mouse peripheral blood **(M)**, and RIPK3 measurement after BM reconstitution in chimeric mice (**N**, *n* = 5). Data are shown as means ± SEM, ***P <* 0.01, student’s t test.


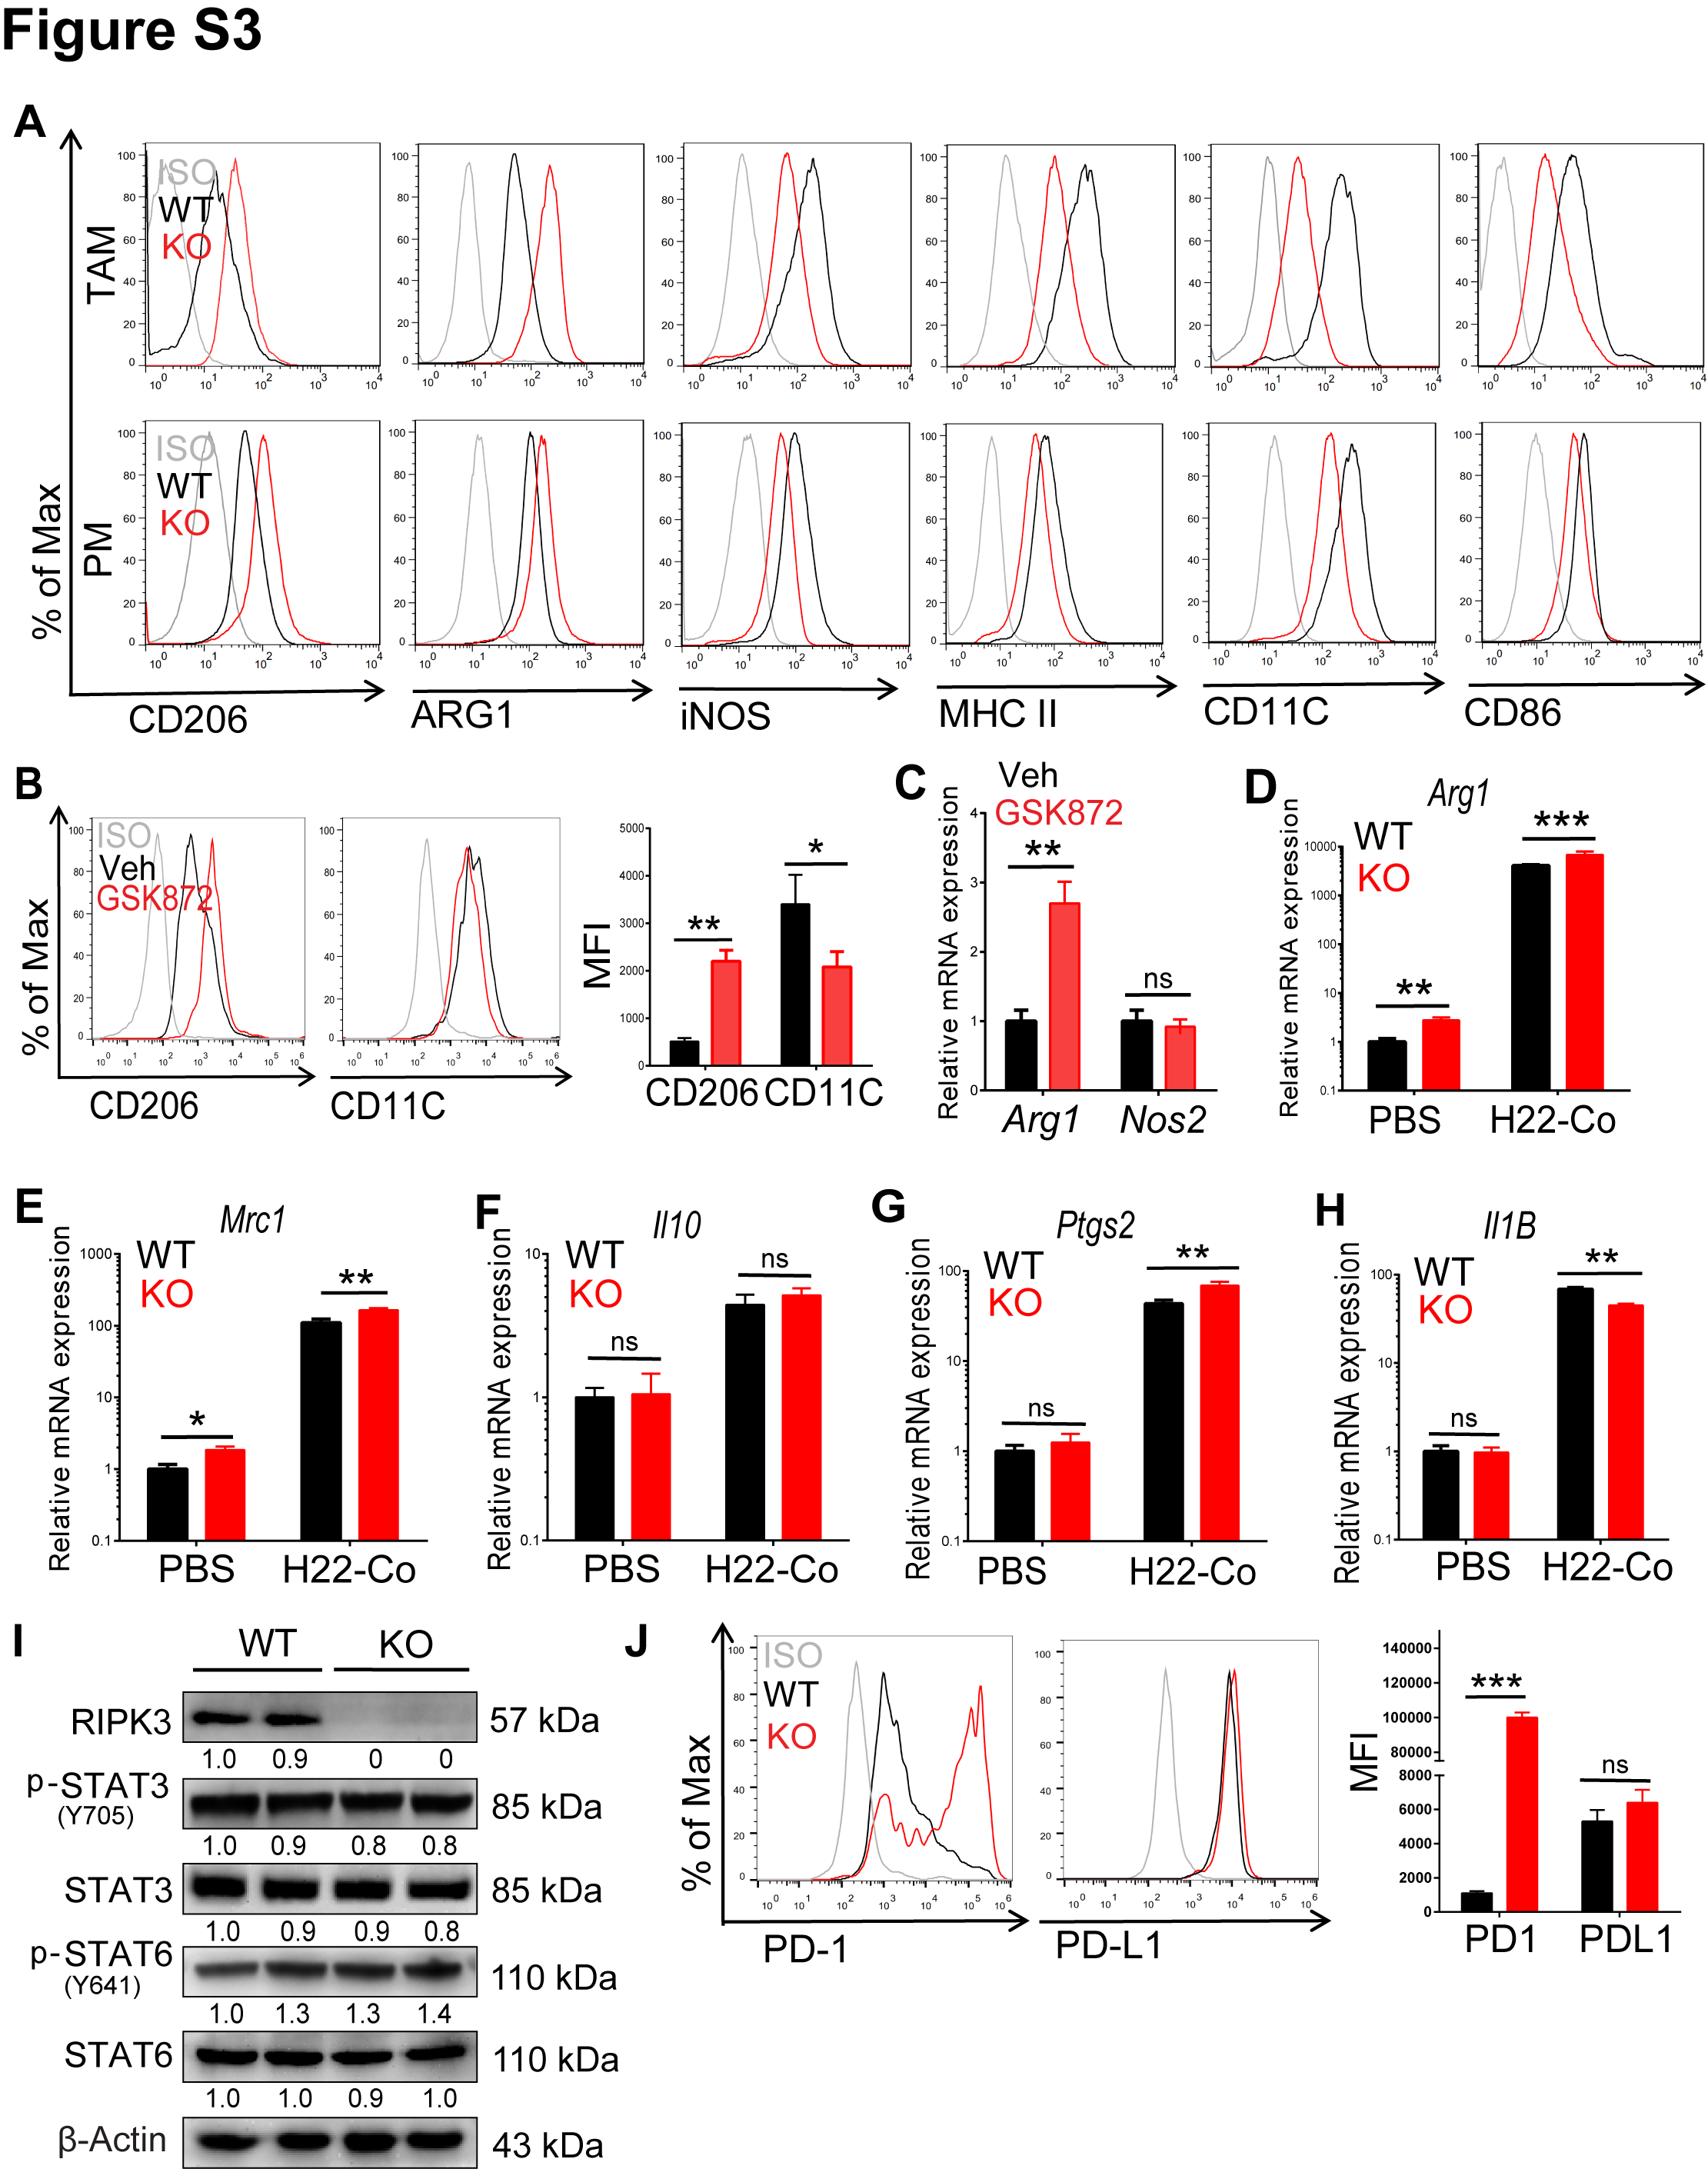


**Figure S3. RIPK3 regulates the phenotype of TAMs. A,** Representative histogram plots of CD206, ARG1, iNOS, MHC II, CD11C and CD86 expression in TAMs or PMs from WT and RIPK3-KO mice. **B, C,** WT PMs was treated by either Veh (0.1% DMSO) or GSK872 (3 μM), CD206 and CD11C expression were determined by FCM **(B)**, relative mRNA expression of *Arg1* and *NOS2* were determined by qPCR **(C)**. **D-J,** WT and KO BMDMs were cocultured with H22 (1:1) for 48 hrs, the mRNA expression of *Arg1* **(D)***, Mrc1* **(E)***, Il10* **(F)***, Ptgs2* **(G)** and *Il1B* **(H)** were determined by qPCR analysis, the protein levels RIPK3, phosphor-STAT3, STAT3, phosphor-STAT6 and STAT6 were determined by western blot **(I)**, PD-L1 and PD-1 expression were detected by FCM **(J**, *n =* 4**)**. Data are expressed as means ± SEM. **P* < 0.05, ***P <* 0.01, ****P <* 0.001, student’s t test.


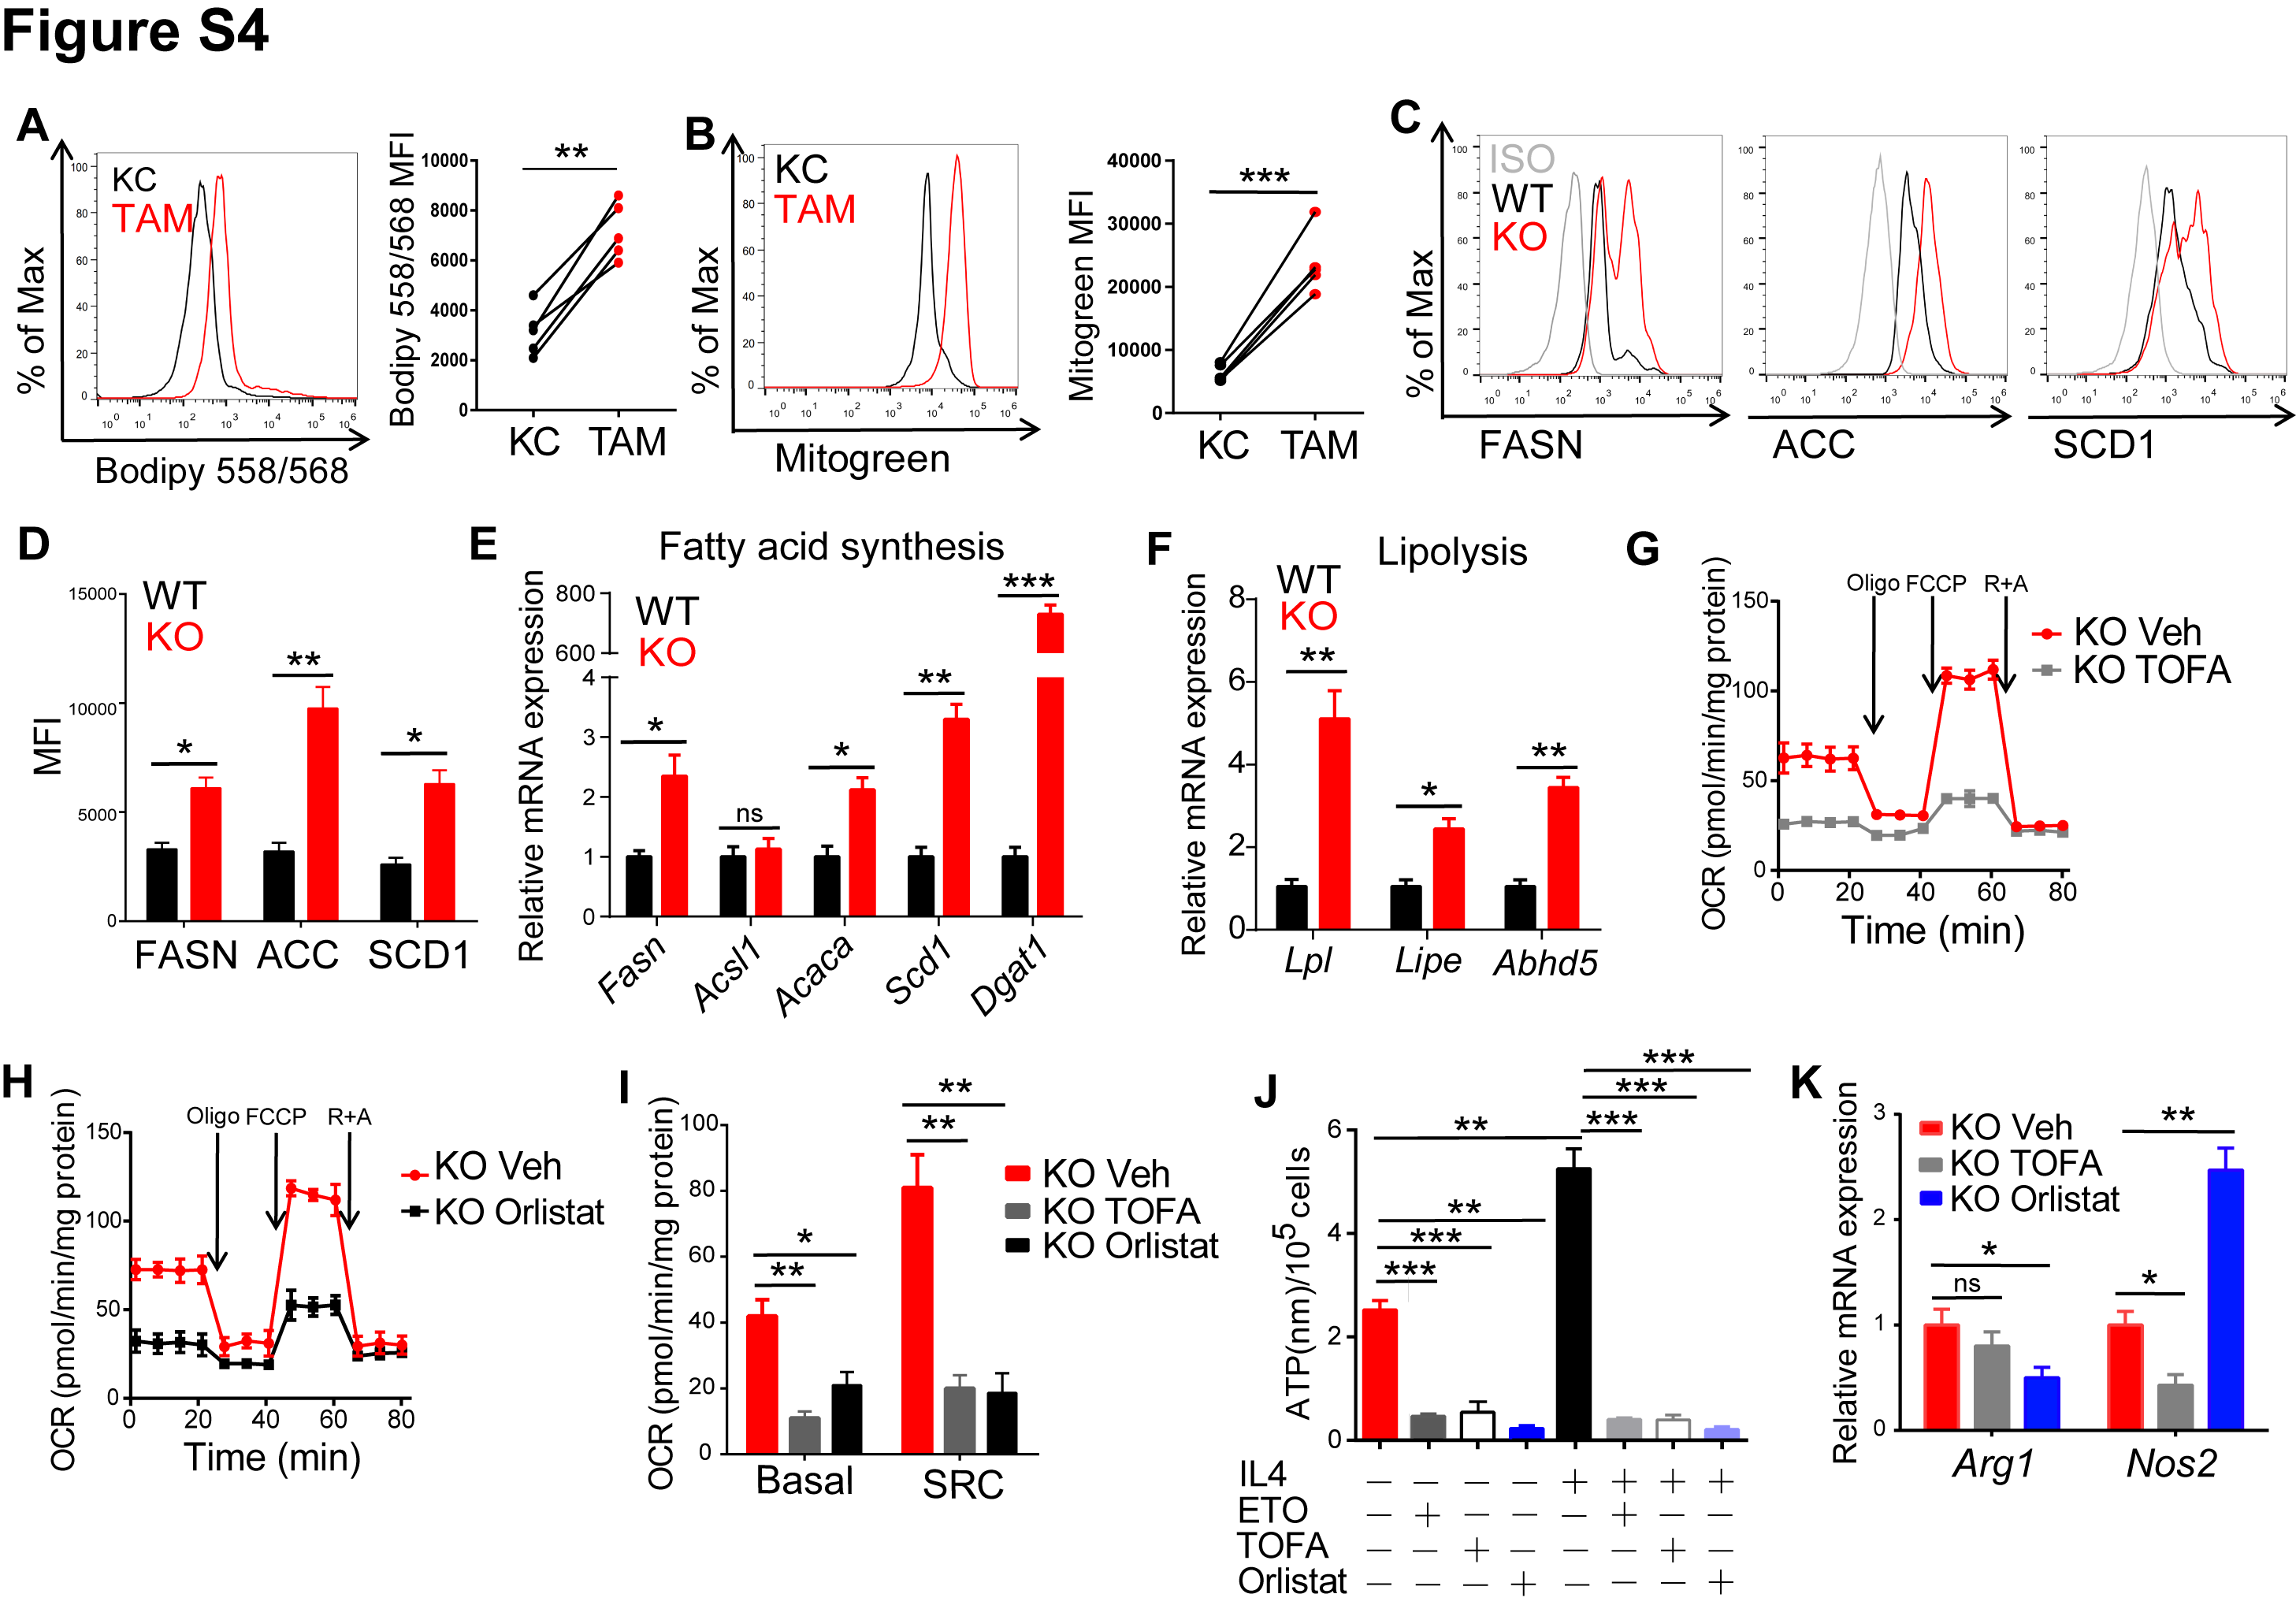


**Figure S4. RIPK3 regulates fatty acids metabolism. A, B,** TAMs from human HCC and KCs from adjacent tissues were stained with Bodipy 558/568 (**A)** and Mitogreen **(B)** for FCM analysis; *n =* 5. **C, D,** The expression of FASN, ACC and SCD1 in TAMs from WT and KO mice; *n =* 4. **E, F,** WT and KO PMs were cocultured with H22 (1:1) for 48 hrs, fatty acidbiosynthesis related gene *Fasn*, *Acsl1*, *Acaca*, *Scd1*, *Dgat1* **(E)** and lipolysis related gene *Lpl*, *Lipe,* *Abhd5* **(F)** expression were evaluated by qPCR. **G-I,** RIPK3-KO PMs were cocultured with H22 (1:1) for 48 hrs in the presence of Veh (0.1% DMSO) or fatty acid synthesis inhibitor TOFA (20 µM, **G**), lipolysis inhibitor Orlistat (100 µM, **H**), OCR and SRC **(I)** were measured; *n =* 4. **J,** KO PMs were cocultured with H22 (1:1) for 48 hrs and then treated with (+) or without (-) ETO (200 µM), TOFA (20 µM) and Orlistat (100 µM) for 24 hrs in the presence of absence of IL4, ATP production was determined; *n =* 4. **K,** KO PMs were cocultured with H22 (1:1) for 48 hrs and then treated with or without TOFA (20 µM) and Orlistat (100 µM), relative expression of *Arg1* and *NOS2* were determined by qPCR. Data are expressed as means ± SEM. *P < 0.05, ***P <* 0.01, student’s t test.


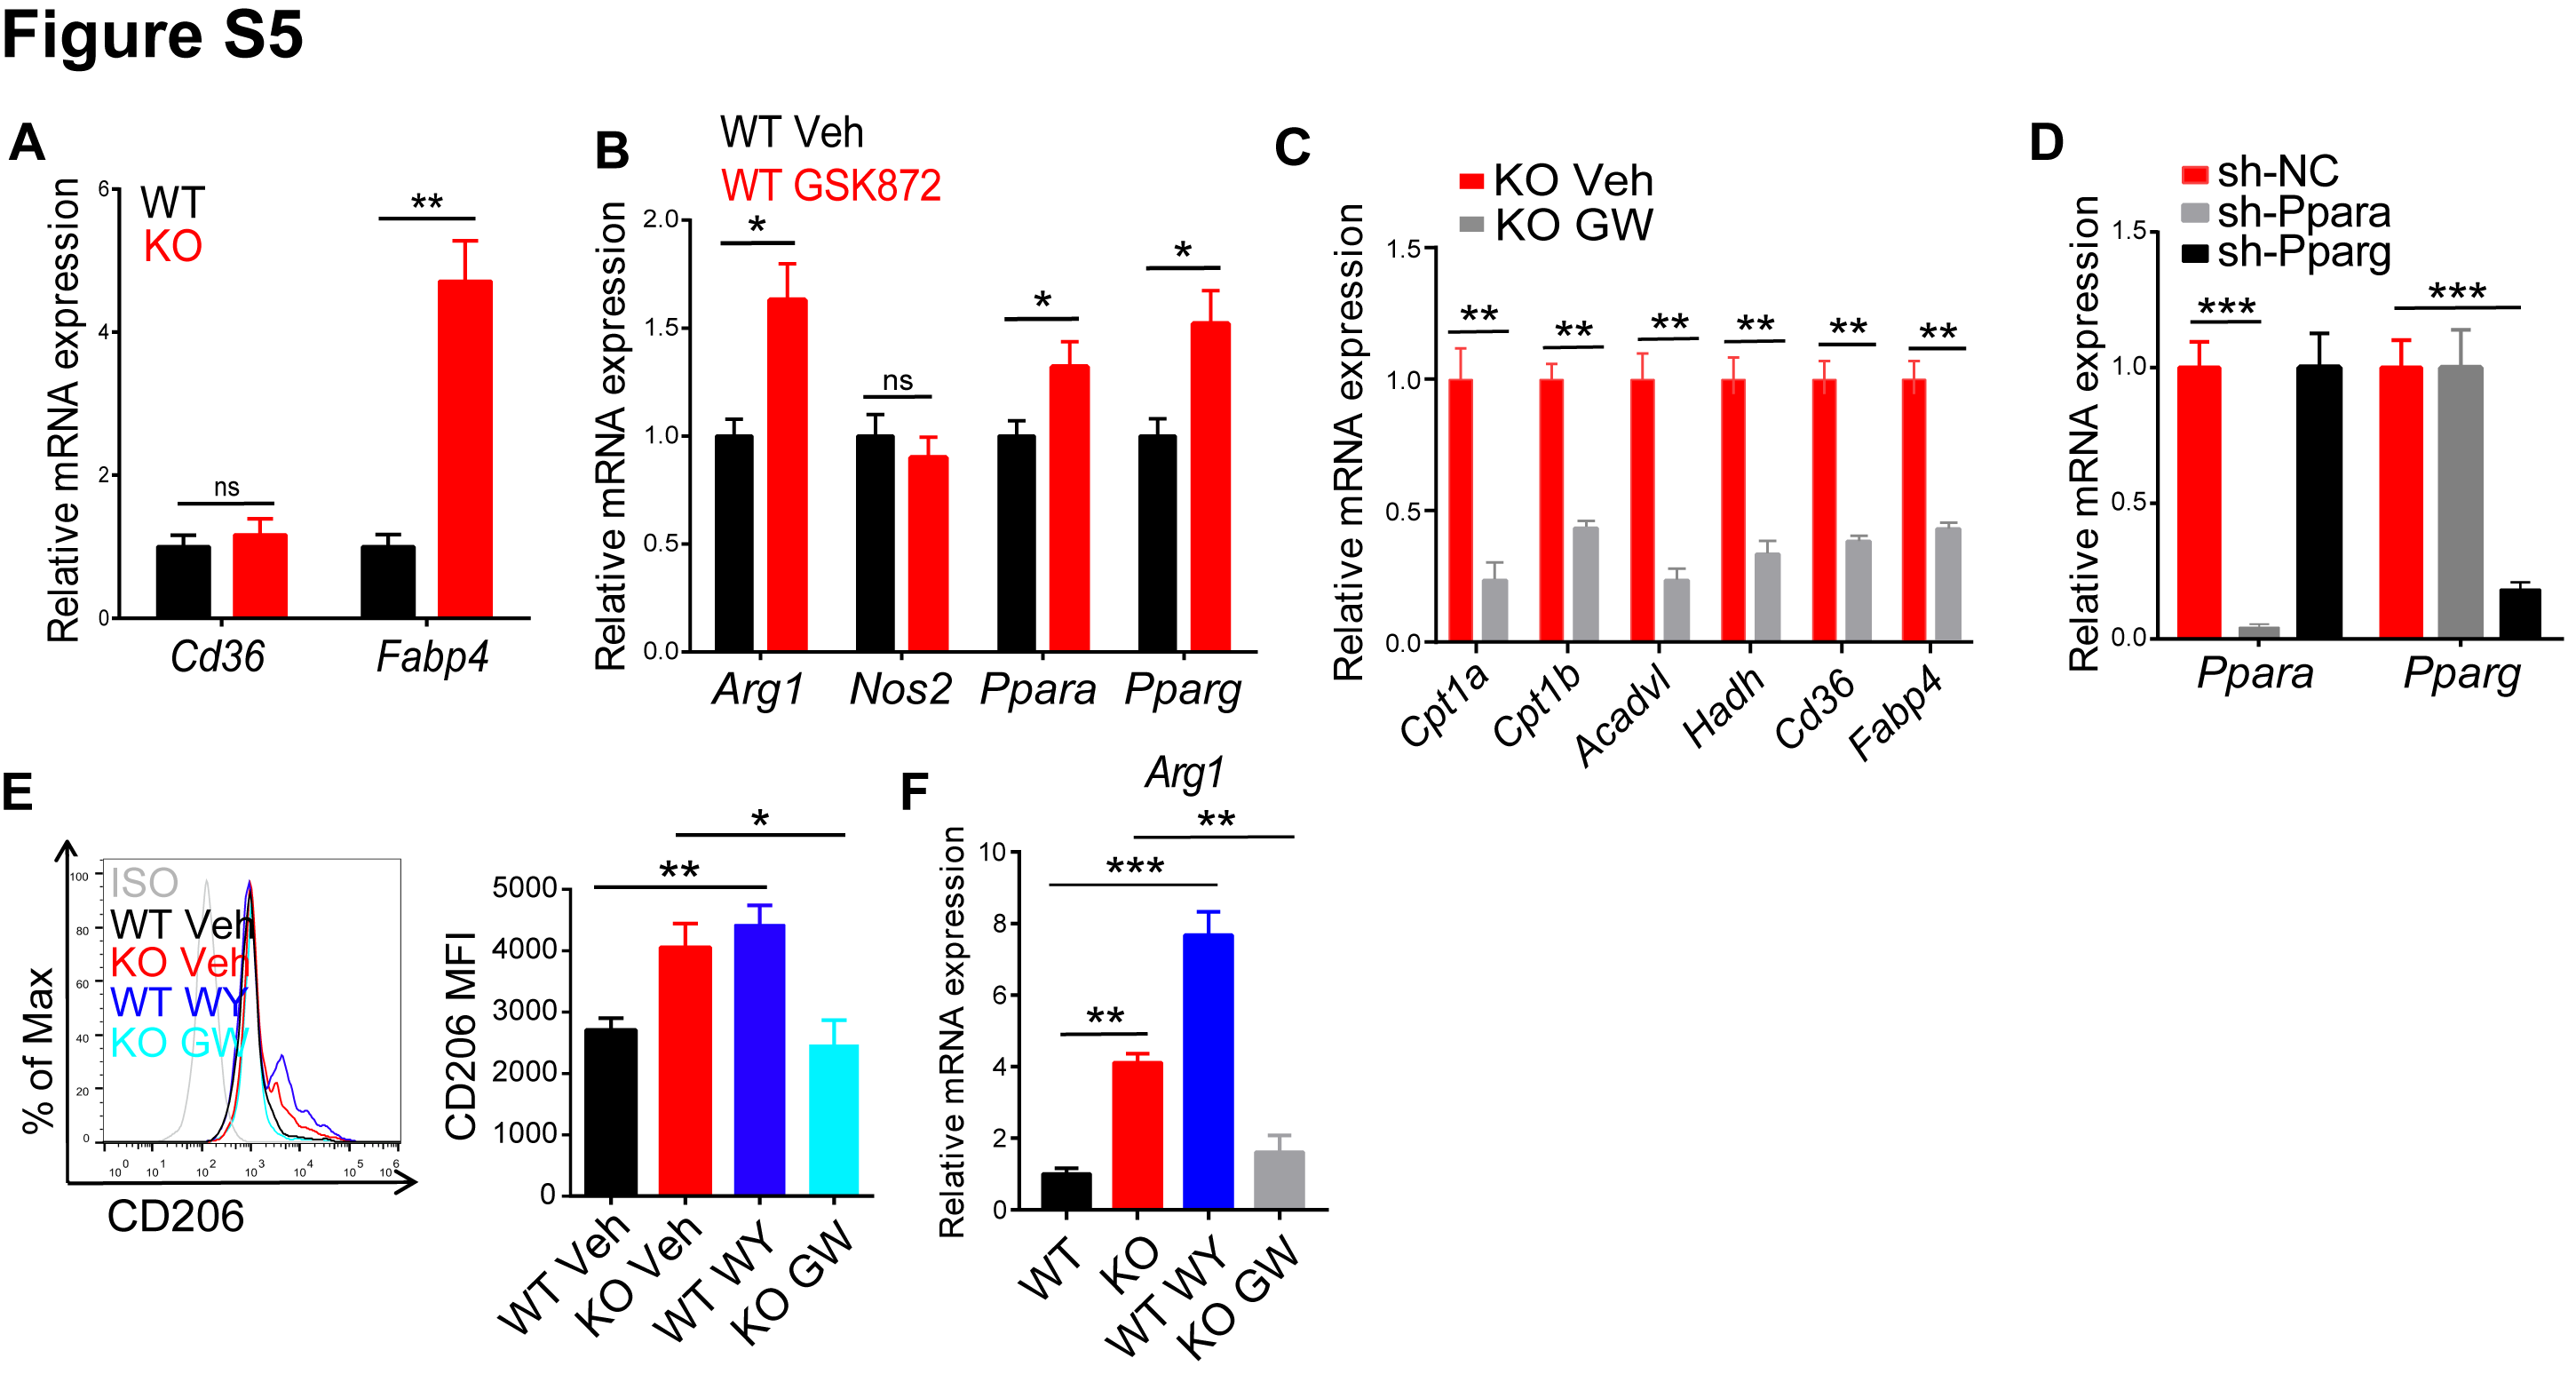


**Figure S5. RIPK3 deficiency regulates PPAR pathway. A,** WT and KO PMs were cocultured with H22 (1:1) for 48 hrs, relative mRNA expression of *Cd36*, *Fabp4* were determined by qPCR; *n =* 3. **B,** WT PMs were treated with GSK872 (3 μM) for 24 hrs, the expression of *Arg1*, *Nos2*, *Ppara* and *Pparg* was analyzed; *n =* 3. **C,** WT PMs was treated with GW (10 nM), the expressions of *Cpt1a*, *Cpt1b*, *Acadvl*, *Hadh*, *Cd36 and* *Fabp4*were analyzed. **D,** KO PMs were transduced with sh-NC, sh-Ppara and Pparg (sh-Pparg), the mRNA levels of *Ppara*, *Pparg*were assessed by qPCR; *n =* 3. **E, F,** WT and KO PMs were treated with GW or PPAR agonist Wy-14643 (WY, 200 µM), CD206 expression was determined by FCM **(E)**, *Arg1* expression was determined by qPCR (**F**; *n =* 3). Data are expressed as means ± SEM. **P <*0.05, ***P <*0.01, ****P <*0.001, student’s t test.


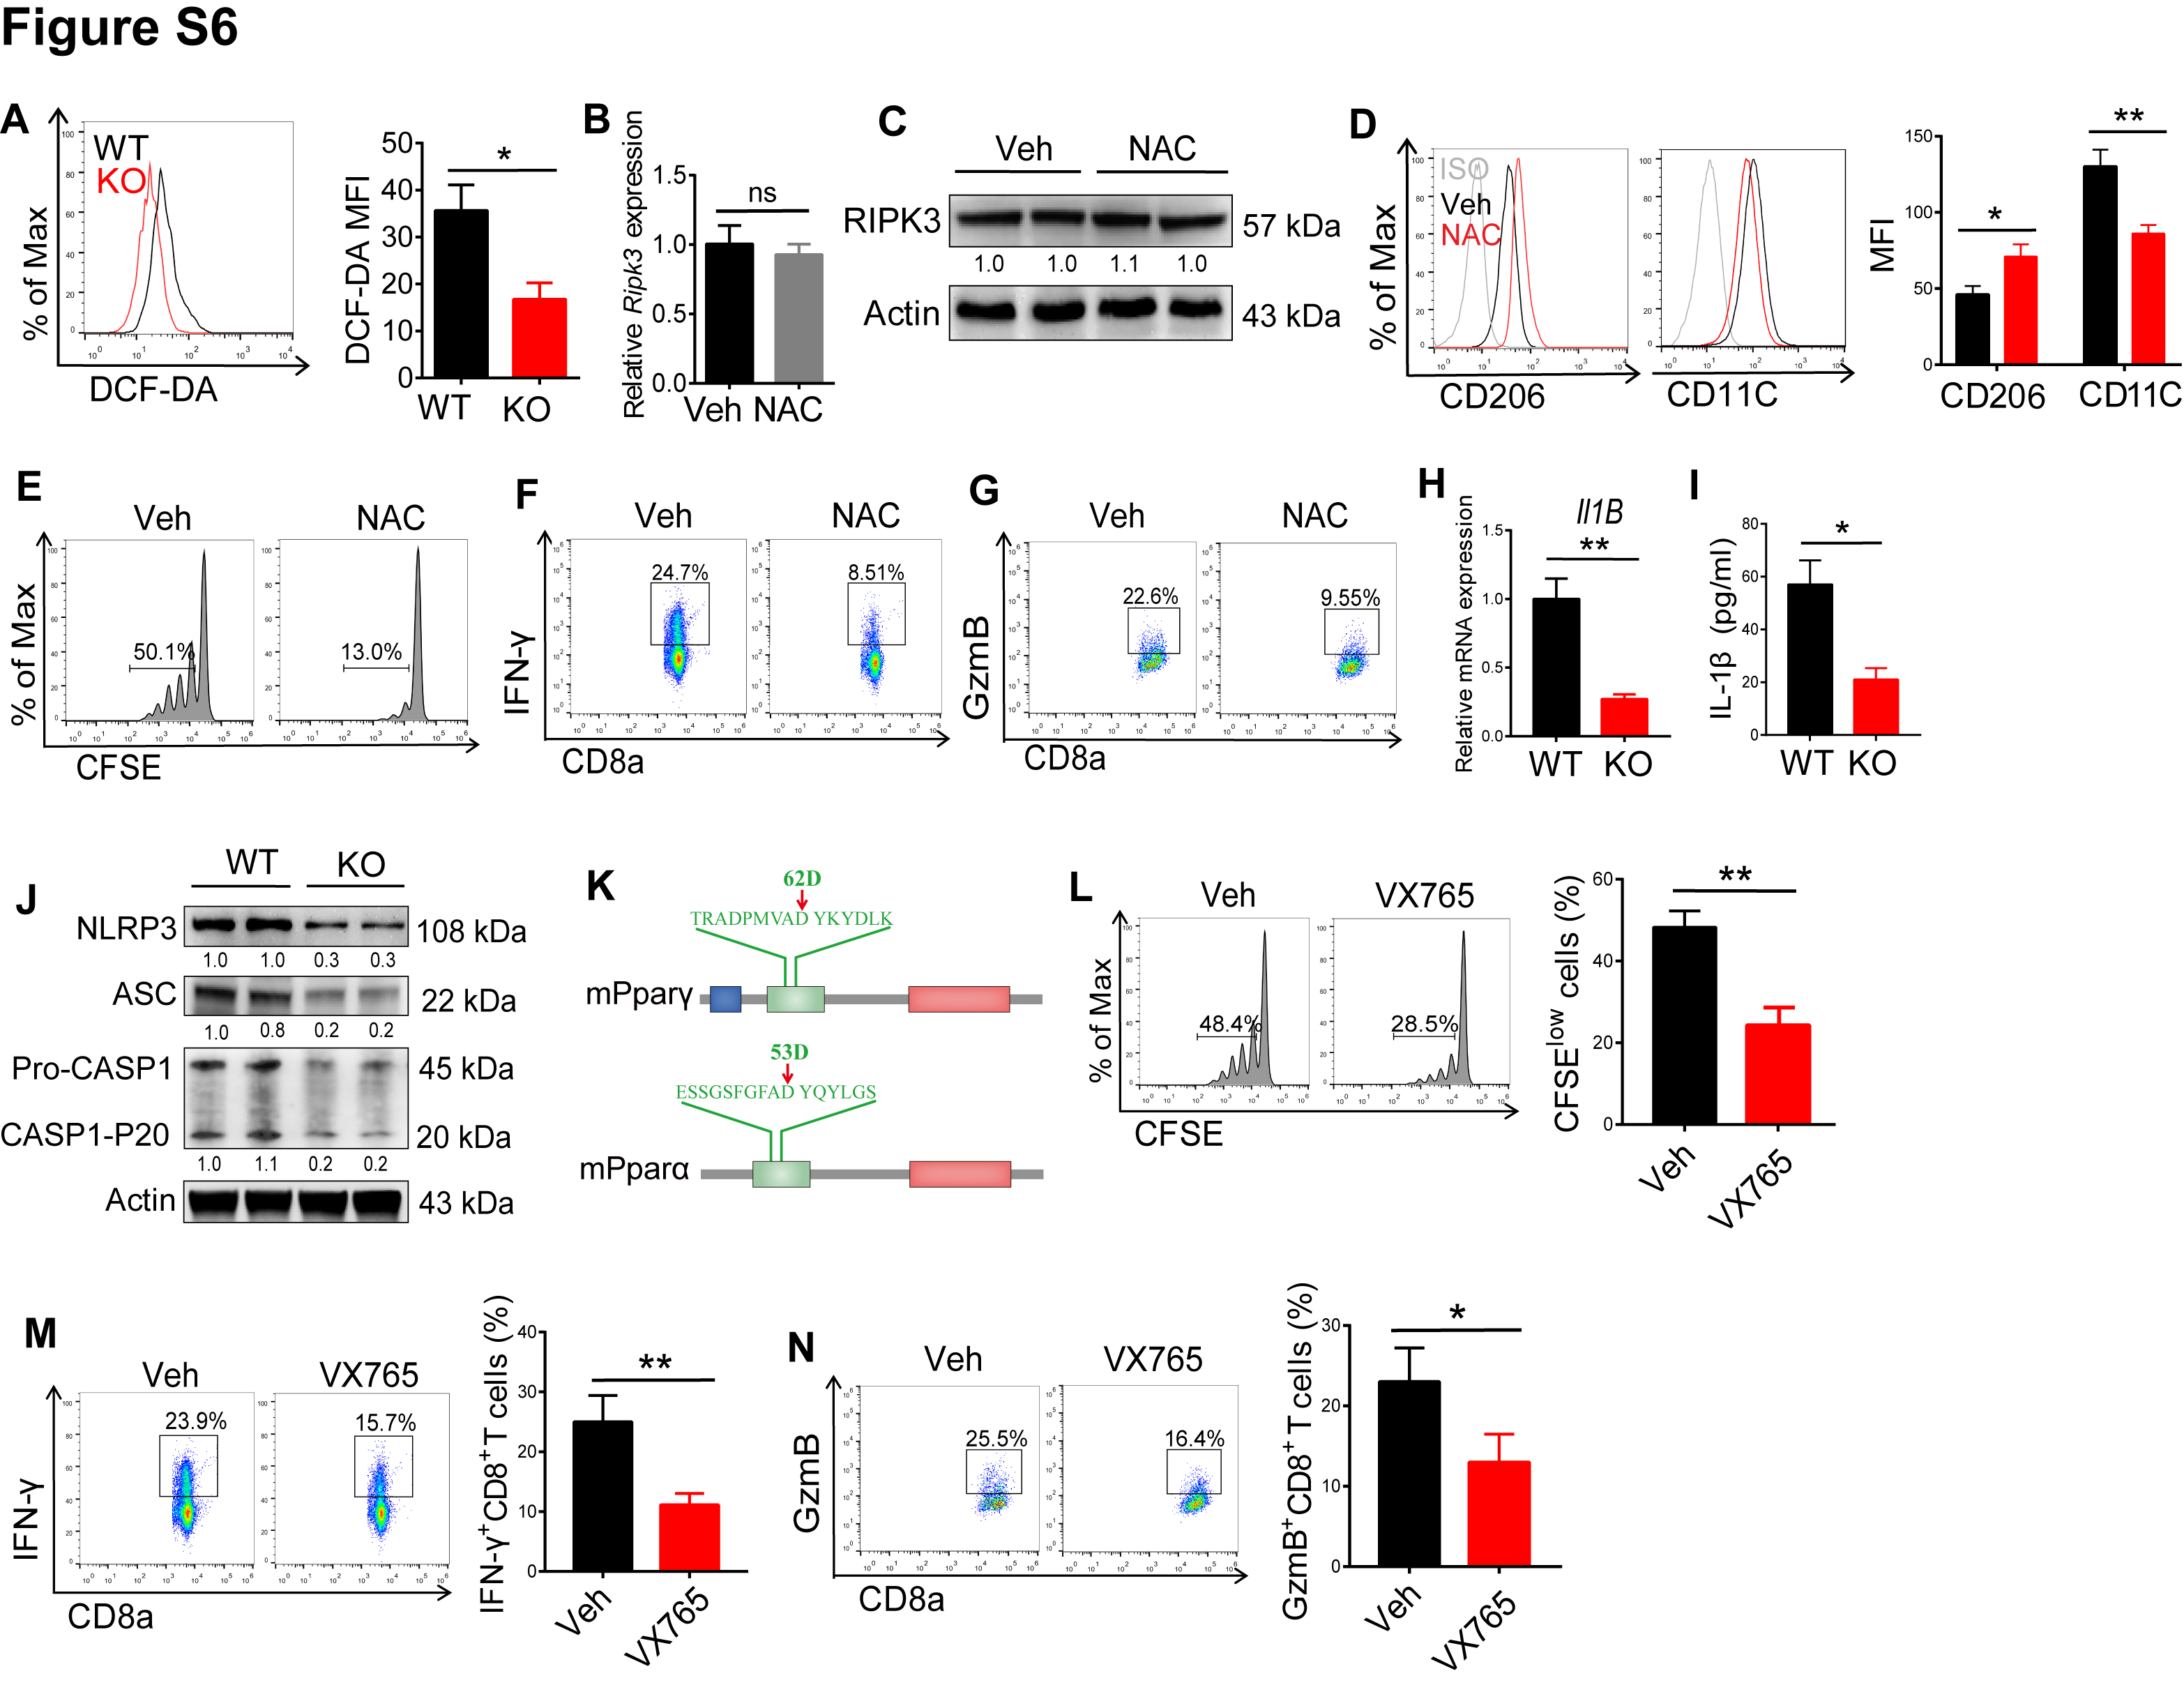


**Figure S6.** **RIPK3 suppresses fatty acids metabolism through ROS-CASPASE1**-**PPAR pathway. A**, ROS expression in WT and KO PMs were analyzed; *n* = 5. **B-D**, WT PMs were treated with NAC (10 mM) for 24 hrs, relative mRNA **(B)** and protein **(C)** expression of RIPK3 were determined by qPCR, CD206 and CD11C expression were analyzed by FCM (**D**; *n* = 5). **E**-**G**, WT PMs were cocultured with H22 (1:1) for 48 hrs in the presence or absence of NAC (10 mM) and then cocultured with isolated CD8+ T lymphocytes (1:1) for 3 days, anti-CD3 and anti-CD28 induced proliferation (**E**), the production of IFN-γ (**F**) and GzmB (**G**) in CD8+ T cells were measured. H-J, WT and KO PMs were cocultured with H22 (1:1) for 48 hrs, the mRNA level of Il1B was analyzed (**H**; *n* = 3), the supernatant IL-1β levels was measured using an ELISA assay kit (**I**; *n* = 3), protein expression of NLRP3, ASC and CASPASE1 were determined (**J**). **K**, Predicted cleavage site for PPARγ and PPARα. **L**-**N**, WT PMs were cocultured with H22 (1:1) for 48 hrs in the presence or absence of VX765 (1 µM) and then cocultured with isolated CD8+ T lymphocytes (1:1) for 3 days, anti-CD3 and anti-CD28 induced proliferation (**L**), and production of IFN-γ (**M**) and GzmB (**N**) in CD8+ T cells were measured. Data are expressed as means ± SEM. *P < 0.05, **P < 0.01, student’s t test.

**
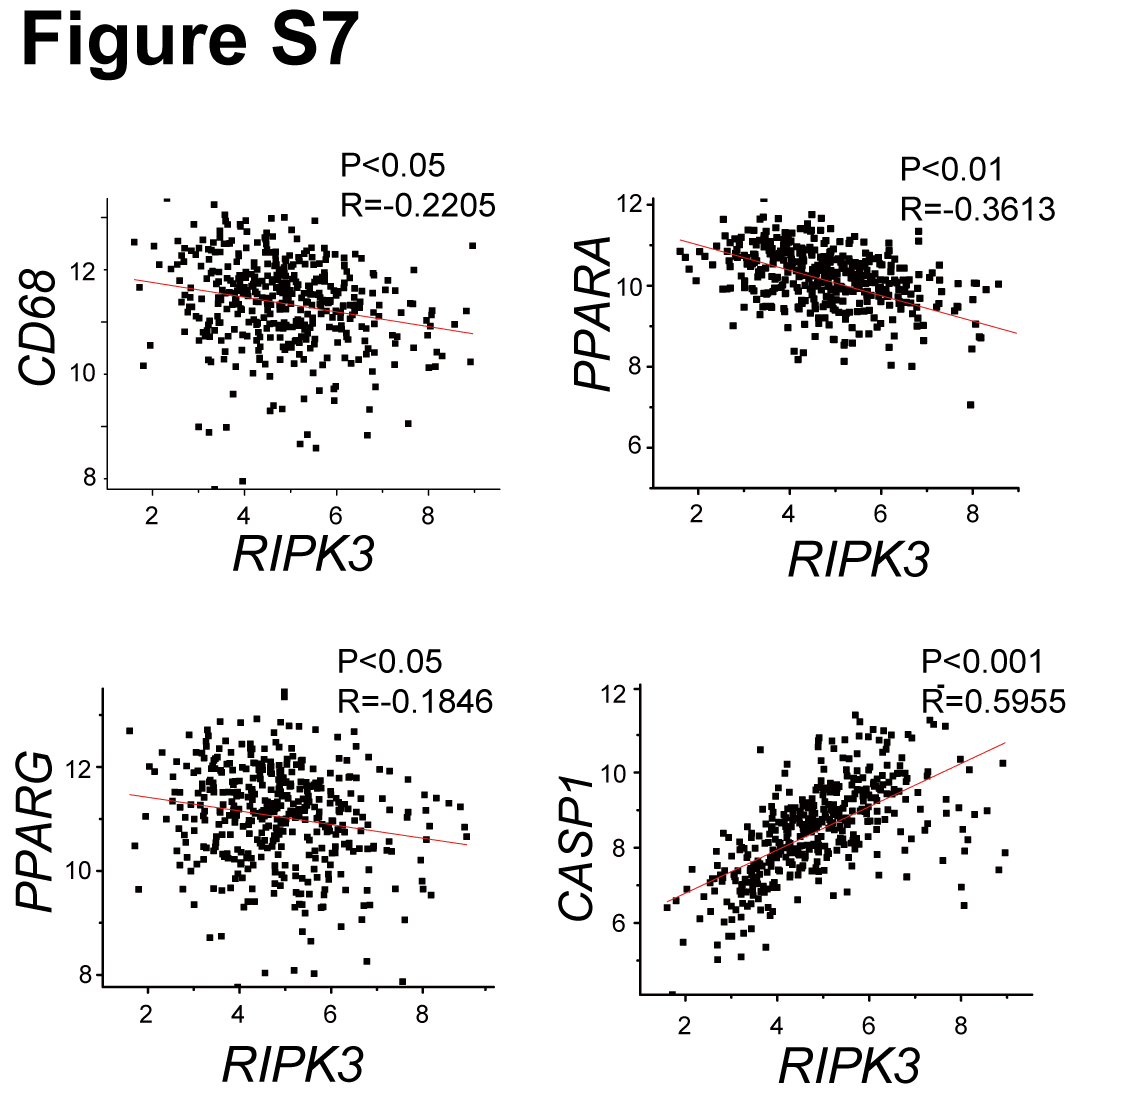
**

**Figure S7**. **RIPK3 correlation with *CD68*, *PPARs* and *Caspase1*.** Pearson’s correlation coefficient was applied to determine the correlation between *RIPK3* and genes including *CD68*, *PPARA*, *PPARG* and *Caspase1* in human HCC tissues using the TCGA database.
